# Supplementary material for: Manipulation of Ovarian Function Significantly Influenced Trabecular and Cortical Bone Volume, Architecture and Density in Mice at Death
Source: PLoS One. 2015 Dec 30;10(12):e0145821. doi: 10.1371/journal.pone.0145821 (PMC4696788; doi:10.1371/journal.pone.0145821)
Supplement: S4 Table — (XLSX) [file pone.0145821.s006.xlsx]

## Sheet: Sheet1
	Table S4. Effect on epiphyseal medial tibial plateau.
	Treatment group	IT-S	IT-TX-c	IT-TX-a	OX-S	OX-TX
	BV (mm3)	0.229 ± 0.054	0.171 ± 0.01	0.156 ± 0.008	0.288 ± 0.076	0.280 ± 0.068
	TV (mm3)	3.08 ± 0.708	2.65 ± 0.564	2.10 ± 0.108	3.76 ± 0.947	3.63 ± 0.847
	mBV/TV (%)	0.075 ± 0.009	0.070 ± 0.011	0.074 ± 0.003	0.077 ± 0.008	0.078 ± 0.012
	BS/BV (mm-1)	50.9 ± 13.4	48.0 ± 5.51	48.6 ± 2.75	50.3 ± 9.39	40.8 ± 11.4
	TbTh (mm)	0.041 ± 0.009	0.042 ± 0.005	0.041 ± 0.002	0.041 ± 0.008	0.052 ± 0.013
	TbN (mm-1)	11.4 ± 2.59	9.30 ± 2.42	11.0 ± 1.72	10.5 ± 2.41	10.5 ± 4.65
	TbSp (mm)	0.050 ± 0.013	0.075 ± 0.033	0.051 ± 0.011	0.054 ± 0.023	0.057 ± 0.028
	Tb.Pf (mm-1)	8.10 ± 2.22	7.86 ± 7.93	7.63 ± 8.08	3.95 ± 5.80	5.75 ± 3.83
	MD-Tb (mgHA/cm3)	283 ± 66.6	300 ± 73.7	338 ± 87.0	292 ± 37.0	303 ± 70.6
	MD-Cb (mgHA/cm3)	355 ± 61.7	368 ± 59.4	405 ± 35.9	363 ± 45.4	394 ± 45.9
